# Supplementary material for: Population Pharmacokinetics of Palbociclib and Its Correlation with Clinical Efficacy and Safety in Patients with Advanced Breast Cancer
Source: MDPI journal article supplement (doi:10.3390/pharmaceutics14071317), 2022-06-21
Supplement: s1 [file s1]

## Electronic supplementary material

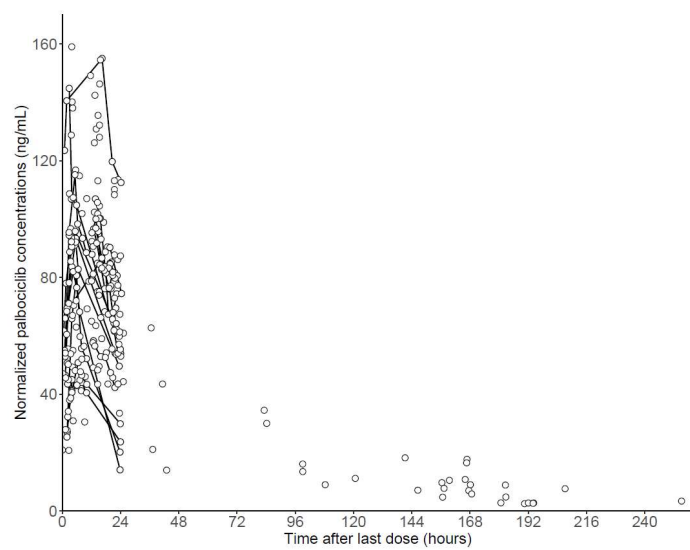

Figure S1. Normalized observed palbociclib plasma concentrations-time profiles. Concentrations are normalized for a daily dose of 125 mg. Concentrations from patients with rich sampling are joined with black lines.

(A)

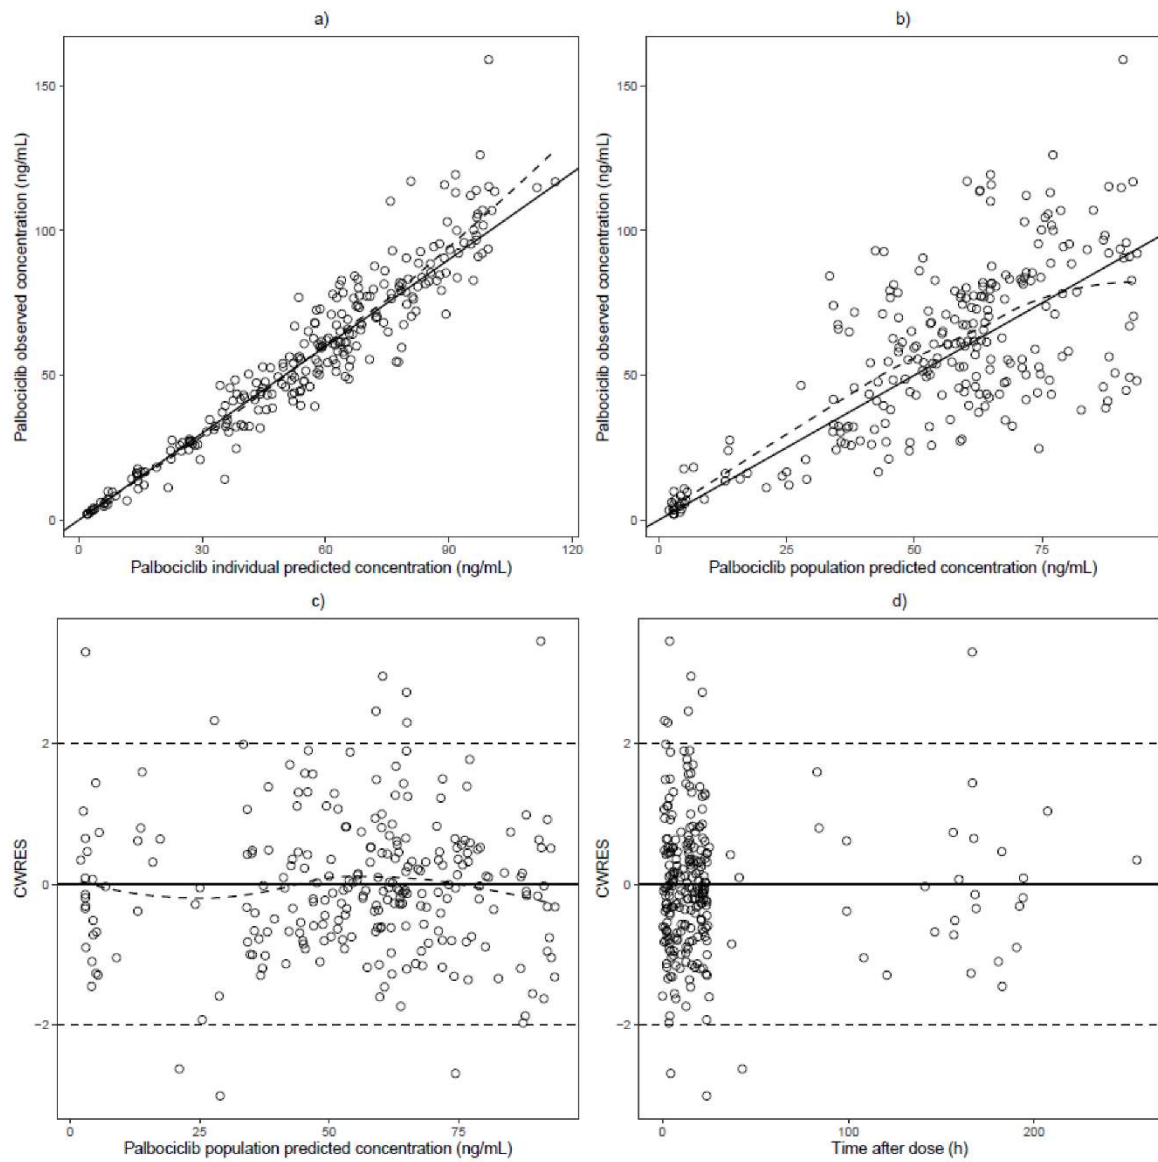

(B)

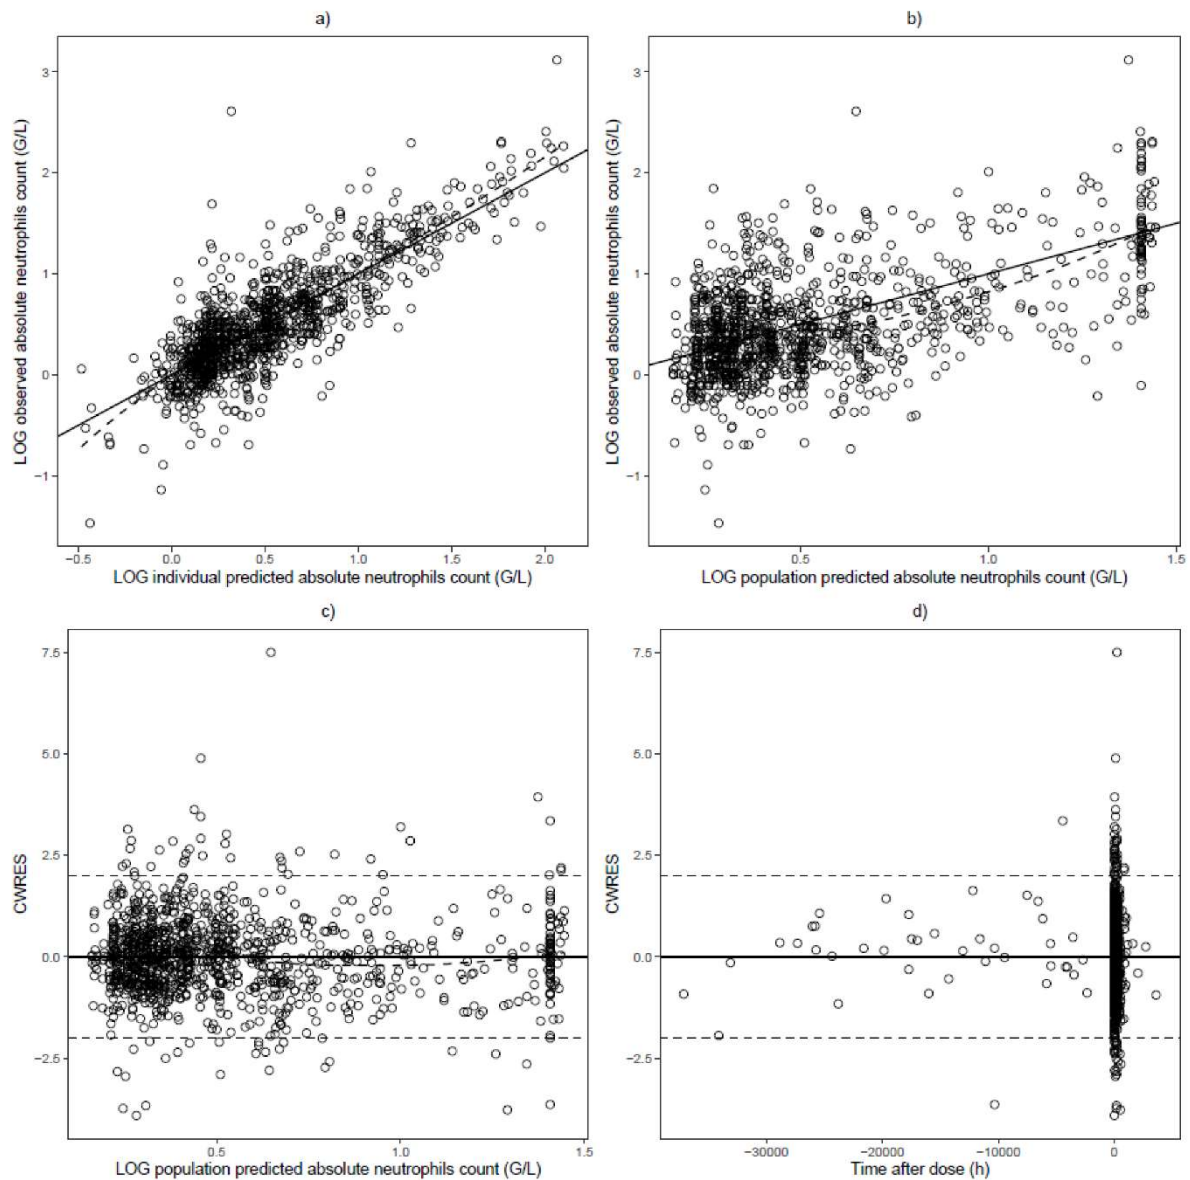

Figure S2: Goodness-of-fit plots of the final model for palbociclib concentrations (A) and ANC time course (B). Loess smooth curves are printed in grey. a) Observed concentrations vs. individual predictions; line of identity is printed in black. b) Observed concentrations vs. population predictions; identity line is printed in black. c) Conditional weighted residuals (CWRES) vs. population predictions; ordinate value zero line is printed in black. d) CWRES vs. time post-dose; ordinate value zero line is printed in black

Table S1: Parameter estimates of the final palbociclib PK-only model with bootstrap results.

| Parameter                                       | Final model |         | Bootstrap<br>(n=2000 samples) |                   |
|-------------------------------------------------|-------------|---------|-------------------------------|-------------------|
|                                                 | Estimate    | RSE (%) | Median                        | CI <sub>95%</sub> |
| $k_a$ ( $h^{-1}$ )                              | 0.73        | 34      | 0.78                          | 0.39-3.27         |
| $\omega_{ka}$ (CV%)                             | 126         | 25      | 121                           | 33-458            |
| ALAG (h)                                        | 1.9         | 4       | 1.9                           | 1.7-2.6           |
| CL ( $L \cdot h^{-1}$ )                         | 68          | 5       | 68.0                          | 61-75             |
| $\omega_{CL}$ (CV%)                             | 30          | 12      | 29                            | 22-36             |
| CL <sub>IPP, no food</sub> ( $L \cdot h^{-1}$ ) | 106         | 9       | 106                           | 88-144            |
| $V_c$ (L)                                       | 2730        | 10      | 2700                          | 2136-3229         |
| $\omega_{Vc}$ (CV%)                             | 36          | 24      | 34                            | 14-56             |
| Q ( $L \cdot h^{-1}$ )                          | 5.1         | 43      | 5.2                           | 3.2-23.7          |
| $V_p$ (L)                                       | 717         | 10      | 807                           | 655-2931          |
| Proportional residual error (%)                 | 18          | 19      | 17                            | 14-20             |

ALAG: absorption lag-time, CI: confidence interval, CL: clearance, CL<sub>IPP, no food</sub>: clearance with concomitant coadministration of IPP under fasting conditions, CV: coefficient of variation,  $k_a$ : absorption rate constant, RSE: relative standard error, Q: inter-compartmental clearance,  $V_c$ : central volume of distribution,  $V_p$ : peripheral volume of distribution,  $\omega$ : between subject variability.

Table S2: Results from the Cox analysis.

| Parameter                                   | Coefficient | Hazard ratio | p-value |
|---------------------------------------------|-------------|--------------|---------|
| AUC <sub>cum90</sub>                        | 0.030       | 1.030        | 0.682   |
| Older age (>65 years)                       | -0.872      | 0.418        | 0.048   |
| Interaction AUC <sub>cum90</sub> *older age | -0.125      | 0.883        | 0.266   |

Results are presented for an increase in 100 AUC units.
